# Supplementary material
Source: PubMed Central journal article supplement (PMC6526074)
Supplement: NIHMS1509064-supplement-2.pdf [file NIHMS1509064-supplement-2.pdf]

## Supplementary Table 1

**Table 1** Chemical modification patterns and sequences of siRNAs

| siRNA ID               | Gene      | Accession number | Targeting Position | Sense                                      | Antisense                                             | Conjugate       |
|------------------------|-----------|------------------|--------------------|--------------------------------------------|-------------------------------------------------------|-----------------|
| siRNA <sup>sFLT1</sup> | sFLT1-i13 | NM_001159920     | 2247               | mG.mA.mG.G.mU.G.A.mG.mC.A.mC.mU.G#mC#mA    | PmU.G.fC.A.G.fU.G.fC.fU.fC.A.fC.fC.U#fC#U#G#A#U#U     | Teg-cholesterol |
| siRNA <sup>sFLT1</sup> | sFLT1-i13 | NM_001159920     | 2252               | mG.mA.mG.mC.A.mC.mU.G.mC.A.A.mC.A#mA#mA    | PmU.fU.fU.G.fU.fU.G.fC.A.G.fU.G.fC.fU#fC#A#fC#fC#U#C  | Teg-cholesterol |
| siRNA <sup>sFLT1</sup> | sFLT1-i13 | NM_001159920     | 2253               | mA.mG.mC.A.mC.mU.G.mC.A.A.mC.A.A#mA#mA     | PmU.fU.fU.fU.G.fU.fU.G.fC.A.G.fU.G.fC#fU#fC#A#fC#fC#U | Teg-cholesterol |
| siRNA <sup>sFLT1</sup> | sFLT1-i13 | NM_001159920     | 2256               | mA.mC.mU.G.mC.A.A.mC.A.A.mA.A.A#mG#mA      | PmU.fC.fU.fU.U.fU.fU.G.fU.fU.G.fC.A.G#fU#G#fC#fU#fC#A | Teg-cholesterol |
| siRNA <sup>sFLT1</sup> | sFLT1-i13 | NM_001159920     | 2279               | mU.mC.mU.mC.G.G.mA.mU.mC.mU.mC.C.A#mA#mA   | PmU.fU.fU.G.G.mA.G.A.fU.fC.fC.G.A.mG#A#G#mA#A#A#A     | Teg-cholesterol |
| siRNA <sup>sFLT1</sup> | sFLT1-i13 | NM_001159920     | 2280               | mC.mU.mC.G.G.mA.mU.mC.mU.mC.C.A.A#mA#mA    | PmU.fU.fU.fU.G.G.mA.G.A.fU.fC.fC.G.A#mG#A#G#mA#A#A    | Teg-cholesterol |
| siRNA <sup>sFLT1</sup> | sFLT1-i13 | NM_001159920     | 2283               | mG.mG.mA.mU.mC.mU.mC.C.A.A.A.mU.mU#mU#mA   | PmU.A.A.A.fU.fU.fU.G.G.mA.G.A.fU.fC#fC#rG#A#G#A#G     | Teg-cholesterol |
| siRNA <sup>sFLT1</sup> | sFLT1-i13 | NM_001159920     | 2284               | mG.mA.mU.mC.mU.mC.mC.A.A.mA.mU.mU.mU#mA#mA | PmU.fU.A.A.mA.fU.fU.fU.G.G.mA.G.A.fU#fC#fC#G#A#mG#A   | Teg-cholesterol |
| siRNA <sup>sFLT1</sup> | sFLT1-i13 | NM_001159920     | 2286               | mU.mC.mU.mC.mC.A.A.mA.mU.mU.mU.A.A#mA#mA   | PmU.fU.fU.fU.A.A.mA.fU.fU.fU.G.G.mA.G#A#fU#fC#fC#G#A  | Teg-cholesterol |
| siRNA <sup>sFLT1</sup> | sFLT1-i13 | NM_001159920     | 2293               | mA.mU.mU.mU.A.A.mA.A.G.mC.A.mC.A.A#mA#mA   | PmU.fU.fU.G.fU.G.fC.fU.U.fU.fU.A.A.mA#fU#fU#G#G#A     | Teg-cholesterol |
| siRNA <sup>sFLT1</sup> | sFLT1-i13 | NM_001159920     | 2294               | mU.mU.mU.A.A.mA.A.G.mC.A.mC.A.A.A#mG#mA    | PmU.fC.fU.fU.G.fU.G.fC.fU.U.fU.fU.A.A#mA#fU#fU#fU#G#G | Teg-cholesterol |
| siRNA <sup>sFLT1</sup> | sFLT1-i13 | NM_001159920     | 2295               | mU.mU.A.A.mA.A.G.mC.A.mC.A.A.mG#mG#mA      | PmU.fC.fC.U.fU.G.fU.G.fC.U.fU.fU.A.A#mA#fU#fU#fU#G    | Teg-cholesterol |
| siRNA <sup>sFLT1</sup> | sFLT1-i13 | NM_001159920     | 2304               | mC.mA.A.mG.G.A.mA.mU.G.A.mU.mU.G#mU#mA     | PmU.A.fC.A.A.fU.fC.A.U.fU.fC.fC.U.fU#G#fU#G#fC#fU#U   | Teg-cholesterol |

|                        |            |              |      |                                          |                                                        |                 |
|------------------------|------------|--------------|------|------------------------------------------|--------------------------------------------------------|-----------------|
| siRNA <sup>sFLT1</sup> | sFLT1-i13  | NM_001159920 | 2313 | mA.mU.mU.G.mU.A.mC.mC.A.mC.A.mC.A#mA#mA  | PmU.fU.fU.G.fU.G.fU.G.fU.A.fC.A.A#U#C#A#U#U#C          | Teg-cholesterol |
| siRNA <sup>sFLT1</sup> | sFLT1-i13  | NM_001159920 | 2318 | mA.mC.mC.A.mC.A.mC.A.A.mA.G.mU.A#mA#mA   | PmU.fU.fU.A.fC.fU.U.fU.G.fU.G.fU.G.fU.G#fU#A#C#A#A#U   | Teg-cholesterol |
| siRNA <sup>sFLT1</sup> | sFLT1-i13  | NM_001159920 | 2321 | mA.mC.A.mC.A.A.mA.G.mU.A.A.mU.G#mU#mA    | PmU.A.fC.A.fU.fU.A.fC.fU.U.fU.G.fU.G#U#G#G#U#A#C       | Teg-cholesterol |
| siRNA <sup>sFLT1</sup> | sFLT1-i13  | NM_001159920 | 2322 | mC.mA.mC.A.A.mA.G.mU.A.A.mU.G.mU#mA#mA   | PmU.fU.A.fC.A.fU.fU.A.fC.fU.U.fU.G.fU.G#G#fU#G#G#fU#A  | Teg-cholesterol |
| siRNA <sup>sFLT1</sup> | sFLT1-i13  | NM_001159920 | 2324 | mC.mA.A.mA.G.mU.A.A.mU.G.mU.A.A#mA#mA    | PmU.fU.fU.fU.A.fC.A.fU.fU.A.fC.fU.U.fU.G#G#fU#G#fU#G#G | Teg-cholesterol |
| siRNA <sup>sFLT1</sup> | sFLT1-i13  | NM_001159920 | 2326 | mA.mA.mG.mU.A.A.mU.G.mU.A.A.mA.A#mC#mA   | PmU.G.fU.fU.U.fU.A.fC.A.fU.fU.A.fC.fU#fU#G#fU#G#U      | Teg-cholesterol |
| siRNA <sup>sFLT1</sup> | sFLT1-i13  | NM_001159920 | 2332 | mU.mG.mU.A.A.mA.A.mC.A.mU.mU.A.A#mA#mA   | PmU.fU.fU.fU.A.A.fU.G.fU.fU.U.fU.A.fC#A#fU#fU#A#C#U    | Teg-cholesterol |
| siRNA <sup>sFLT1</sup> | sFLT1-i13  | NM_001159920 | 2333 | mG.mU.A.A.mA.A.mC.A.mU.mU.A.A.mA#mG#mA   | PmU.fC.fU.U.fU.A.A.fU.G.fU.U.fU.fU.A.fC#A#fU#fU#A#C    | Teg-cholesterol |
| siRNA <sup>sFLT1</sup> | sFLT1-i13  | NM_001159920 | 2339 | mC.mA.mU.mU.A.A.mA.G.G.mA.mC.mU.mC#mA#mA | PmU.fU.G.A.G.fU.fC.fC.U.fU.fU.A.A.fU#G#fU#fU#fU#fU#A   | Teg-cholesterol |
| siRNA <sup>sFLT1</sup> | sFLT1-i13  | NM_001159920 | 2343 | mA.mA.mA.G.G.mA.mC.mU.mC.A.mU.mU.A#mA#mA | PmU.fU.fU.A.A.fU.G.A.mG.fU.fC.fC.U.fU#fU#A#A#fU#G#U    | Teg-cholesterol |
| siRNA <sup>sFLT1</sup> | sFLT1-i13  | NM_001159920 | 2351 | mC.mA.mU.mU.A.A.mA.A.A.mG.mU.A.A#mC#mA   | PmU.G.fU.fU.A.fC.fU.U.fU.fU.fU.A.A.fU#G#A#mG#fU#fC#C   | Teg-cholesterol |
| siRNA <sup>sFLT1</sup> | sFLT1-i13  | NM_001159920 | 2353 | mU.mU.A.A.mA.A.A.mG.mU.A.A.mC.A#mG#mA    | PmU.fC.fU.G.fU.fU.A.fC.fU.U.fU.fU.fU.A.A#fU#G#A#mG#U   | Teg-cholesterol |
| siRNA <sup>sFLT1</sup> | sFLT1-i13  | NM_001159920 | 2362 | mA.mA.mC.A.G.mU.mU.G.mU.mC.mU.mC.A#mU#mA | PmU.A.fU.G.A.mG.A.fC.A.A.fC.fU.G.fU#fU#A#C#fU#fU#U     | Teg-cholesterol |
| siRNA <sup>sFLT1</sup> | sFLT1-e15a | NM_001160030 | 2471 | mU.mC.A.mU.mC.A.mU.mC.A.mU.A.G.mC#mU#mA  | PmU.A.G.fC.fU.A.fU.G.A.fU.G.A.fU.G#A#fU#G#A#fU#G       | Teg-cholesterol |
| siRNA <sup>sFLT1</sup> | sFLT1-e15a | NM_001160030 | 2474 | mU.mC.A.mU.mC.A.mU.A.G.mC.mU.A.mU#mC#mA  | PmU.G.A.fU.A.G.fC.fU.A.fU.G.A.fU.G#A#fU#G#A#fU#G       | Teg-cholesterol |
| siRNA <sup>sFLT1</sup> | sFLT1-e15a | NM_001160030 | 2477 | mU.mC.A.mU.A.G.mC.mU.A.mU.mC.A.mU#mC#mA  | PmU.G.A.fU.G.A.fU.A.G.fC.fU.A.fU.G#A#fU#G#A#fU#G       | Teg-cholesterol |



|                        |            |              |      |                                              |                                                              |                 |
|------------------------|------------|--------------|------|----------------------------------------------|--------------------------------------------------------------|-----------------|
| siRNA <sup>sFLT1</sup> | sFLT1-e15a | NM_001160030 | 2588 | mA.mC.A.A.mU.mC.A.mU.A.A.mC.A.A#mU#mA        | PmU.A.fU.fU.G.fU.fU.A.fU.G.A.fU.fU.G#fU#fC#fU#fU#G#G         | Teg-cholesterol |
| siRNA <sup>sFLT1</sup> | sFLT1-e15a | NM_001160030 | 2590 | mA.mA.mU.mC.A.mU.A.A.mC.A.A.mU.A.A#mA#mA     | PmU.fU.fU.A.fU.fU.G.fU.fU.A.fU.G.A.fU#fU#G#fU#fC#fU#U        | Teg-cholesterol |
| siRNA <sup>sFLT1</sup> | sFLT1-i13  | NM_001159920 | 2283 | fG#mG#fA.mU.fC.mU.fC.mC.fA.mA.fA.mU.fU#mU#fA | PmU#fA#mA.fA.mU.fU.mU.fG.mG.fA.mG.fA.mU#fC#mC#fG#mA#fG#mA#fG | Teg-cholesterol |
| siRNA <sup>sFLT1</sup> | sFLT1-e15a | NM_001160030 | 2519 | fU#mA#fG.mC.fU.mA.fC.mC.fA.mU.fU.mU.fA#mU#fA | PmU#fA#mU.fA.mA.fA.mU.fG.mG.fU.mA.fG.mC.fU#mA#fU#mG#fA#mU#fG | Teg-cholesterol |
| siRNA <sup>sFLT1</sup> | sFLT1-i13  | NM_001159920 | 2318 | fA#mC#fC.mA.fC.mA.fC.mA.fA.mA.fG.mU.fA#mA#fA | PmU#fU#mU.fA.mC.fU.mU.fU.mG.fU.mG.fU.mG#mU#fA#mC#fA#mA#fU    | Teg-cholesterol |
| siRNA <sup>sFLT1</sup> | sFLT1-e15a | NM_001160030 | 2585 | fA#mA#fG.mA.fC.mA.fA.mU.fC.mA.fU.mA.fA#mC#fA | PmU#fG#mU.fU.mA.fU.mG.fA.mU.fU.mG.fU.mC.fU#mU#fG#mG#fC#mU#fC | Teg-cholesterol |
| siRNA <sup>PPIB</sup>  | PPIB       | NM-009693.2  | 437  | fC#mA#fA.mA.fU.mU.fC.mC.fA.mU.fC.mG.fU#mG#fA | PmU#fC#mA.fC.mG.fA.mU.fG.mG.fA.mA.fU.mU.fU#mG#fC#mU#fG#mU#fU | Teg-cholesterol |
| siRNA <sup>NTC</sup>   | NA         | NA           | NA   | fU#mG#fA.mC.fA.mA.fA.mU.fA.mC.fG.mA.fU#mU#fA | PmU#fA#mA.fU.mC.fG.mUfA.mU.fU.mU.fG.mU.fC#mA#fA#mU#fC#mA#fU  | Teg-cholesterol |
| PNA <sup>sFLT1</sup>   | sFLT1-i13  | NM_001159920 | 2283 | C*T*C*T*C*G*A*T*C*T*C*C*A*A*A*T*T*A          |                                                              | CY3 -(OO)-      |
| PNA <sup>sFLT1</sup>   | sFLT1-e15a | NM_001160030 | 2519 | C*A*T*C*A*T*A*G*C*T*A*C*C*A*T*T*A*T*A        |                                                              | CY3 -(OO)-      |

Chemical modifications are designated as follows. "." – phosphodiester bond, "#" – phosphorothioate bond, "\*" – peptide bond, "m" – 2'-OMethyl, "f" – 2'-Fluoro, "P" – 5' Phosphate, "teg-cholesterol" – tetraethylene glycol (teg)-Cholesterol, (OO) – O-linker (PNA Bio)
